# Supplementary material for: Cultured Mesenchymal Cells from Nasal Turbinate as a Cellular Model of the Neurodevelopmental Component of Schizophrenia Etiology
Source: MDPI journal article supplement (doi:10.3390/ijms242015339), 2023-10-19
Supplement: s1 [file s1]

**Supplemental Table S1.** Expression of mesenchymal markers in the MC cluster (MT-CTRL), CNON (CNON-CTRL) and cluster 9 of embryonic brain (CS14\_3, (19)) and bulk CNON (average Transcripts per Million transcripts from 255 CNON samples). According to the Mesenchymal and Tissue Stem Cell Committee of the International Society for Cellular Therapy [31], “MSC must express CD105, CD73 and CD90, and lack expression of CD45, CD34, CD14 or CD11b, CD79a or CD19 and HLA-DR surface molecules”. Other prominent markers of mesenchymal cells are also included in the table.

|                                   | Gene           | Percentage of Cells Expressing gene in the MC cluster | Percentage of Cells Expressing gene in CNON-CTRL | Percentage of Cells Expressing gene in cluster 9, CS14_3 | Bulk CNON, TPM |
|-----------------------------------|----------------|-------------------------------------------------------|--------------------------------------------------|----------------------------------------------------------|----------------|
| Must be expressed                 | NT5E (CD73)    | 7.20                                                  | 68.8                                             | 32.62                                                    | 299.07         |
|                                   | THY1 (CD90)    | 47.88                                                 | 100                                              | 20.92                                                    | 1347.66        |
|                                   | ENG (CD105)    | 10.59                                                 | 77                                               | 25.89                                                    | 16.52          |
| Must NOT be expressed             | CD34           | 0                                                     | 1.64                                             | 1.06                                                     | 1.12           |
|                                   | PTPRC (CD45)   | 2.54                                                  | 0.43                                             | 0                                                        | 0.59           |
|                                   | HLA-DRA        | 49.58                                                 | 0.07                                             | 0.35                                                     | 0.10           |
|                                   | HLA-DRB1       | 44.07                                                 | 0.07                                             | 0.35                                                     | 0.03           |
|                                   | HLA-DRB5       | 0                                                     | 0                                                | 0                                                        | 0.01           |
| One of them must NOT be expressed | CD14           | 4.66                                                  | 32.17                                            | 0                                                        | 9.00           |
|                                   | ITGAM (CD11b)  | 0.42                                                  | 0                                                | 0                                                        | 0.06           |
| One of them must NOT be expressed | CD79A          | 0.42                                                  | 0.70                                             | 0                                                        | 0.16           |
|                                   | CD19           | 0                                                     | 0.02                                             | 0                                                        | 0.04           |
| Other mesenchymal markers         | CD44           | 17.37                                                 | 98.2                                             | 15.96                                                    | 2296.28        |
|                                   | VIM            | 99.15                                                 | 100                                              | 100                                                      | 3869.50        |
|                                   | ALCAM(CD166)   | 19.49                                                 | 90.3                                             | 29.08                                                    | 555.48         |
|                                   | HSPA8 (STRO-1) | 82.63                                                 | 99.4                                             | 52.13                                                    | 495.22         |
|                                   | ANPEP (CD13)   | 2.966                                                 | 59.0                                             | 5.67                                                     | 125.92         |
|                                   | LUM            | 36.86                                                 | 11.4                                             | 12.77                                                    | 87.47          |
