# Supplementary material for: Cultured Mesenchymal Cells from Nasal Turbinate as a Cellular Model of the Neurodevelopmental Component of Schizophrenia Etiology
Source: MDPI journal article supplement (doi:10.3390/ijms242015339), 2023-10-19
Supplement: s1 [file s1]

**Supplemental Table S3.** Gene ontology enrichment analysis of genes differentially expressed in Mesenchymal cells cluster (adjusted P-value < 0.05) in comparison to all other cell types in the middle turbinate.

| GO biological process complete                           | fold Enrichment | P-value  | P.adjust |
|----------------------------------------------------------|-----------------|----------|----------|
| regulation of neuron projection development (GO:0010975) | 5.21            | 1.59E-04 | 1.84E-02 |
| neuron projection development (GO:0031175)               | 3.86            | 5.52E-04 | 4.16E-02 |
| neurogenesis (GO:0022008)                                | 3.6             | 6.93E-06 | 2.13E-03 |
| neuron development (GO:0048666)                          | 3.44            | 6.43E-04 | 4.63E-02 |
| generation of neurons (GO:0048699)                       | 3.32            | 1.28E-04 | 1.57E-02 |
| neuron differentiation (GO:0030182)                      | 3.27            | 2.80E-04 | 2.59E-02 |
| cell-matrix adhesion (GO:0007160)                        | 10.74           | 1.21E-04 | 1.50E-02 |
| cell-substrate adhesion (GO:0031589)                     | 8.97            | 6.48E-05 | 1.02E-02 |
| negative regulation of cell adhesion (GO:0007162)        | 7               | 7.16E-05 | 1.05E-02 |
| cell adhesion (GO:0007155)                               | 5.39            | 4.06E-09 | 7.96E-06 |
| regulation of cell adhesion (GO:0030155)                 | 4.04            | 8.41E-05 | 1.16E-02 |
| tissue migration (GO:0090130)                            | 10.36           | 6.86E-04 | 4.89E-02 |
| ameboidal-type cell migration (GO:0001667)               | 8.66            | 7.84E-05 | 1.10E-02 |
| negative regulation of cell migration (GO:0030336)       | 7.05            | 6.86E-05 | 1.02E-02 |
| positive regulation of cell migration (GO:0030335)       | 5.45            | 1.56E-05 | 3.45E-03 |
| cell migration (GO:0016477)                              | 4.82            | 4.12E-07 | 2.81E-04 |
| regulation of cell migration (GO:0030334)                | 4.37            | 3.28E-06 | 1.25E-03 |
