# Supplementary material for: Cultured Mesenchymal Cells from Nasal Turbinate as a Cellular Model of the Neurodevelopmental Component of Schizophrenia Etiology
Source: MDPI journal article supplement (doi:10.3390/ijms242015339), 2023-10-19
Supplement: s1 [file s1]

**Supplemental Table S2.** Expression of Wnt- and Notch- pathways genes in CNON (SEP036), the MC cluster of MT (SEP310), cluster 9 (CS14\_3) of embryonic brain and bulk CNON (average Transcripts per Million transcripts from 255 CNON samples).

|               | Gene   | Percentage of Cells Expressing Gene in CNON-CTRL | Percentage of Cells Expressing Gene in the MC cluster of MT-CTRL | Percentage of Cells Expressing Gene in Cluster 9 (CS14_3) | Bulk CNON, TPM |
|---------------|--------|--------------------------------------------------|------------------------------------------------------------------|-----------------------------------------------------------|----------------|
| Notch pathway | NOTCH1 | 3.96                                             | 16.10                                                            | 4.96                                                      | 1.21           |
|               | NOTCH2 | 45.98                                            | 11.02                                                            | 15.60                                                     | 96.47          |
|               | NOTCH3 | 4.66                                             | 16.10                                                            | 34.04                                                     | 2.22           |
|               | JAG1   | 14.09                                            | 28.39                                                            | 53.55                                                     | 11.15          |
|               | PSEN1  | 19.13                                            | 5.08                                                             | 3.9                                                       | 85.09          |
|               | PSEN2  | 10.89                                            | 3.81                                                             | 2.13                                                      | 11.30          |
|               | PSENEN | 32.52                                            | 5.51                                                             | 17.73                                                     | 23.58          |
|               | APH1A  | 45.28                                            | 11.86                                                            | 19.86                                                     | 140.18         |
|               | ADAM17 | 27.96                                            | 5.51                                                             | 4.26                                                      | 48.05          |
|               | HES1   | 7.52                                             | 32.63                                                            | 22.7                                                      | 2.15           |
| WNT pathway   | WNT3   | 2.337                                            | 2.12                                                             | 0.35                                                      | 5.65           |
|               | WNT5A  | 39.99                                            | 21.61                                                            | 0.35                                                      | 185.16         |
|               | WNT5B  | 67.39                                            | 2.12                                                             | 7.8                                                       | 150.35         |
|               | WNT6   | 0                                                | 4.66                                                             | 0                                                         | 0.16           |
|               | ROR2   | 7.77                                             | 7.2                                                              | 0                                                         | 3.44           |
|               | LRP5   | 20.9                                             | 4.24                                                             | 2.13                                                      | 7.60           |
|               | LRP6   | 21.6                                             | 16.1                                                             | 3.9                                                       | 18.00          |
|               | AXIN1  | 7.34                                             | 2.12                                                             | 2.48                                                      | 9.21           |
|               | AXIN2  | 1.01                                             | 6.36                                                             | 0                                                         | 1.46           |
|               | FZD1   | 6.89                                             | 6.36                                                             | 2.13                                                      | 5.82           |
|               | FZD2   | 45.75                                            | 9.32                                                             | 8.16                                                      | 23.82          |
|               | FZD3   | 1.78                                             | 1.27                                                             | 1.06                                                      | 0.38           |
|               | FZD4   | 6.12                                             | 4.24                                                             | 1.77                                                      | 3.04           |
|               | FZD5   | 4.15                                             | 3.81                                                             | 0                                                         | 1.08           |
|               | FZD6   | 8.37                                             | 1.69                                                             | 1.06                                                      | 33.64          |
|               | FZD7   | 16.54                                            | 6.36                                                             | 11.7                                                      | 17.72          |
|               | FZD8   | 1.99                                             | 1.69                                                             | 0.71                                                      | 3.96           |
|               | CTNNB1 | 46.28                                            | 18.64                                                            | 16.31                                                     | 308.46         |
|               | SFRP1  | 93.86                                            | 44.49                                                            | 1.42                                                      | 241.89         |
|               | SFRP2  | 82.61                                            | 59.32                                                            | 0.71                                                      | 27.51          |
